# Supplementary material for: Gli3 controls the onset of cortical neurogenesis by regulating the radial glial cell cycle through Cdk6 expression
Source: Oxford University Press journal article supplement (doi:10.1242/dev.163147), 2018-08-09
Supplement: dev163147supp.pdf [file dev163147supp.pdf]

**Supplementary Figure 1: Gli3 expression in cortical progenitors and in *Gli3*<sup>ckO</sup> embryos.** (A, E) Gli3 protein is co-expressed with Pax6 in radial glial cells in the rostromedial (A) and lateral telencephalon (E). (B-D, F-H) Gli3 is transiently expressed in Tbr2+ basal progenitor cells. In the lateral telencephalon, basal progenitors in the deep ventricular zone express Gli3, while Tbr2+ cells in upper positions express little or no Gli3. Arrows demarcate Gli3+Tbr2+ basal progenitors, arrowheads Gli3-Tbr2+ cells. (I-L) Gli3 protein is expressed in the dorsal telencephalon and in the lateral ganglionic eminence (LGE) of E11.5 (I, J) and E12.5 (K, L) embryos and shows a dorsal to ventral expression gradient in the thalamus (th) (L, P). (M, N) In E11.5 *Gli3*<sup>ckO</sup> embryos, Gli3 protein is still present in the rostrolateral cortex while it is absent at more caudal levels. (O, P) The E12.5 cortex lacks Gli3 protein while expression in the CGE, LGE and thalamus is not affected. Scale bars: 50µm (A, E); 200µm (I).

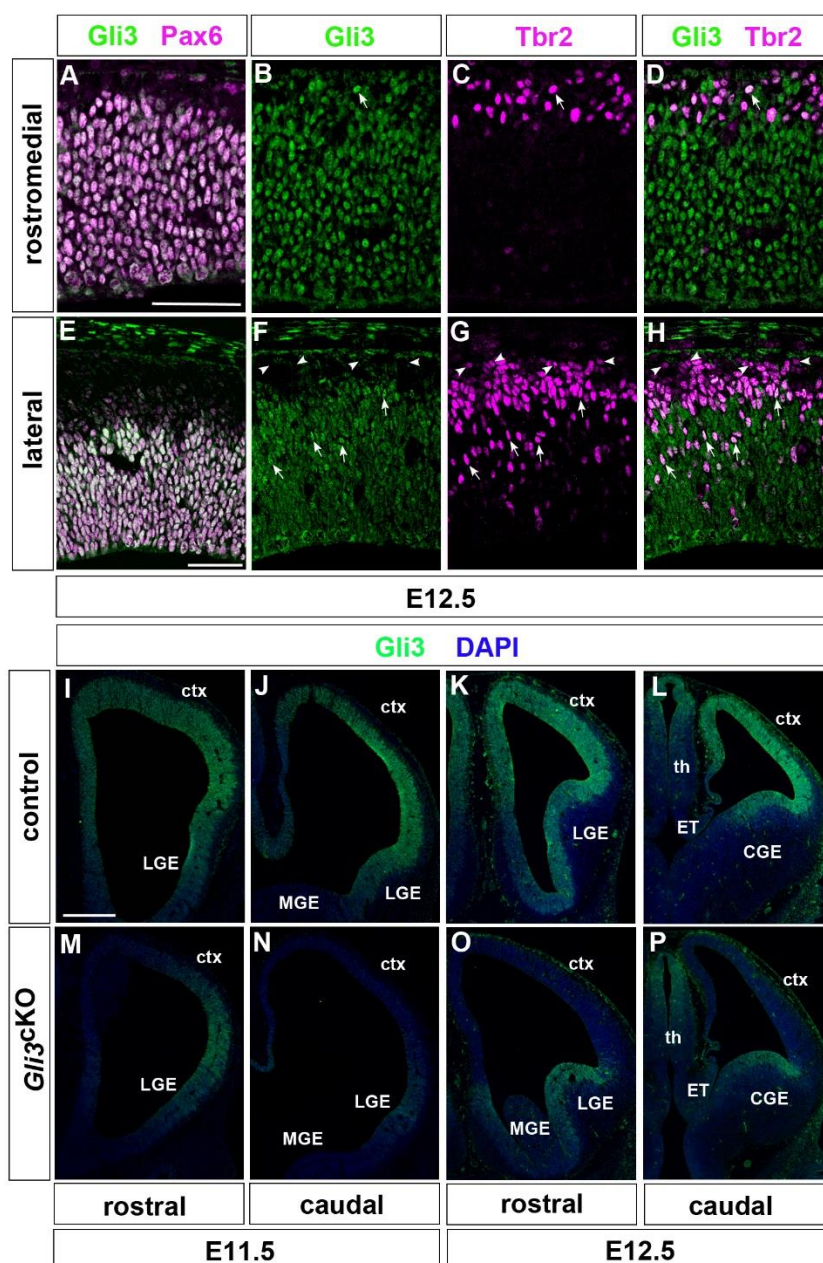

**Supplementary Figure 2: The rostral telencephalon is enlarged in E12.5 *Gli3*<sup>ckO</sup> embryos.** (A, B) Whole mount view of the embryonic heads of a control (A) and a *Gli3*<sup>ckO</sup> embryo (B). Arrows indicate the prominent bulging of the mutant forebrain. Scale bar: 1mm.

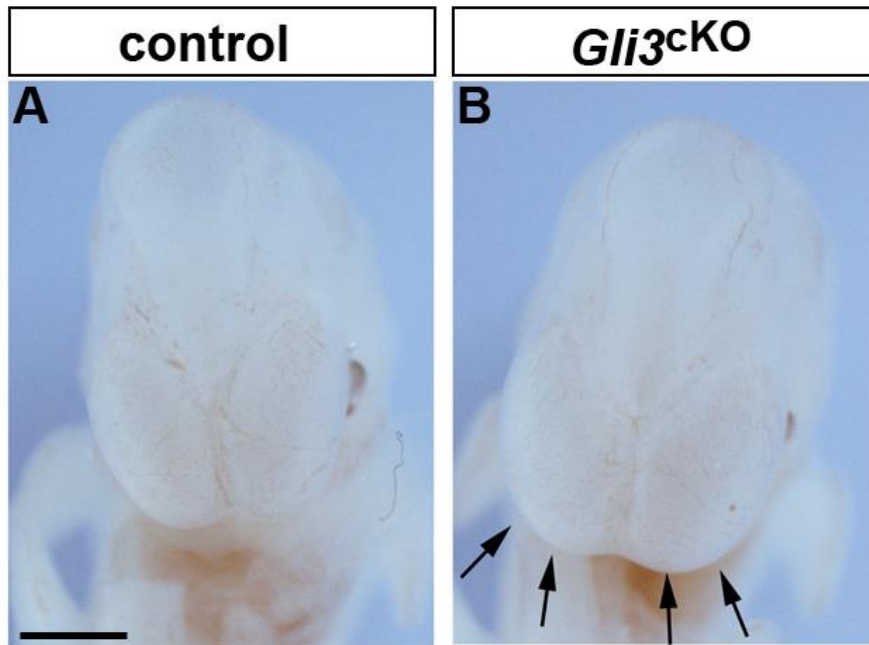

**Supplementary Figure 3: Morphological abnormalities in the rostromedial telencephalon of *Gli3<sup>ckKO</sup>* mutants.** (A, B) Coronal brain sections through the rostral telencephalon of E12.5 control (A) and *Gli3<sup>ckKO</sup>* (B) embryos stained with DAPI. The yellow line in (A) indicates the measurement of midline length. (C) Quantification of midline length. (D, E) Measurements of cell numbers in a 175  $\mu\text{m}$  wide box in E11.5 (D) and E12.5 (E) embryos. All statistical data is presented as means  $\pm$  95% CI; Mann Whitney tests; n = 6 (C); n=7 (D) and n=5 (E); \* p < 0.05; \*\* p < 0.01. ctx: cortex; LGE: lateral ganglionic eminence; sep: septum. Scale bar: 250  $\mu\text{m}$ .

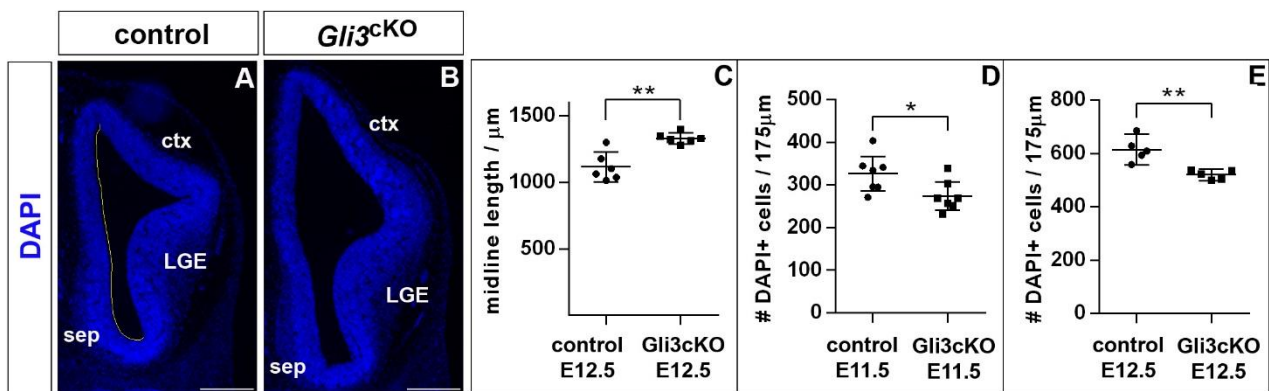

**Supplementary Figure 4: Enlarged ventricular surface in *Gli3<sup>ckO</sup>* mutants.** (A, B) Coronal sections through the brains of an E17.5 control and *Gli3<sup>ckO</sup>* embryo. Yellow lines indicate measurements of the dorsal telencephalic ventricular surface and cortical thickness. (C, D) Statistical evaluation of surface length (C) and thickness (D) measurements. All statistical data is presented as means  $\pm$  95% CI; Mann Whitney tests; n = 5; \* p < 0.05; \*\* p < 0.01. CC: corpus callosum; ctx: cortex; Pb: Probst bundle; sep: septum. Scale bar: 500  $\mu$ m.

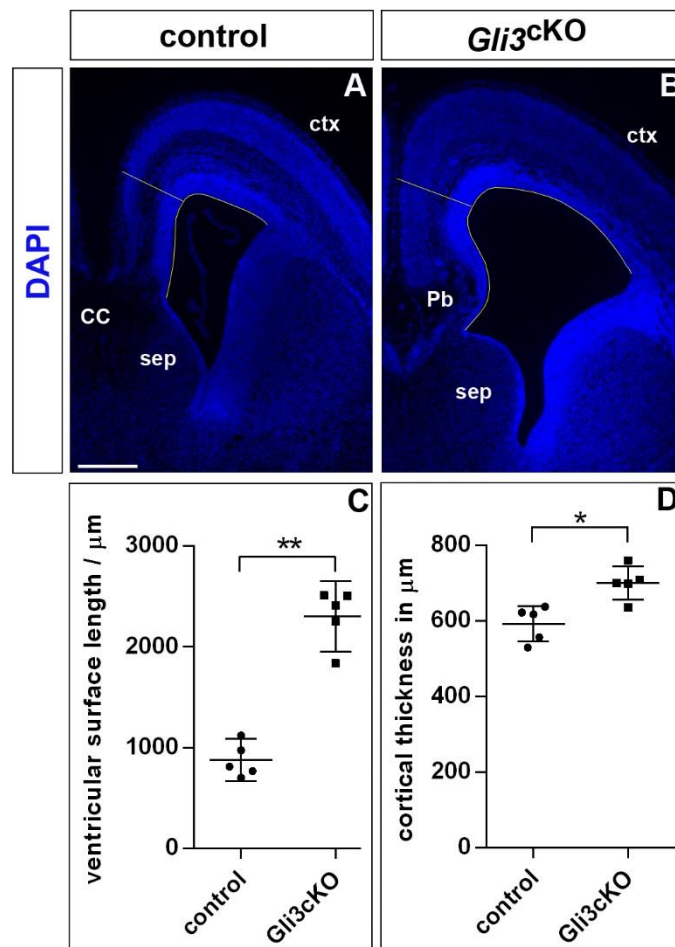

**Supplementary Figure 5: Numbers of cortical neurons in *Gli3*<sup>KO</sup> mutants.** Quantifications of Tbr1+ (A), Ctip2+ (B) and Satb2+ (C) neurons. All statistical data is presented as means  $\pm$  95% CI; Mann Whitney tests; n = 4; \* p < 0.05.

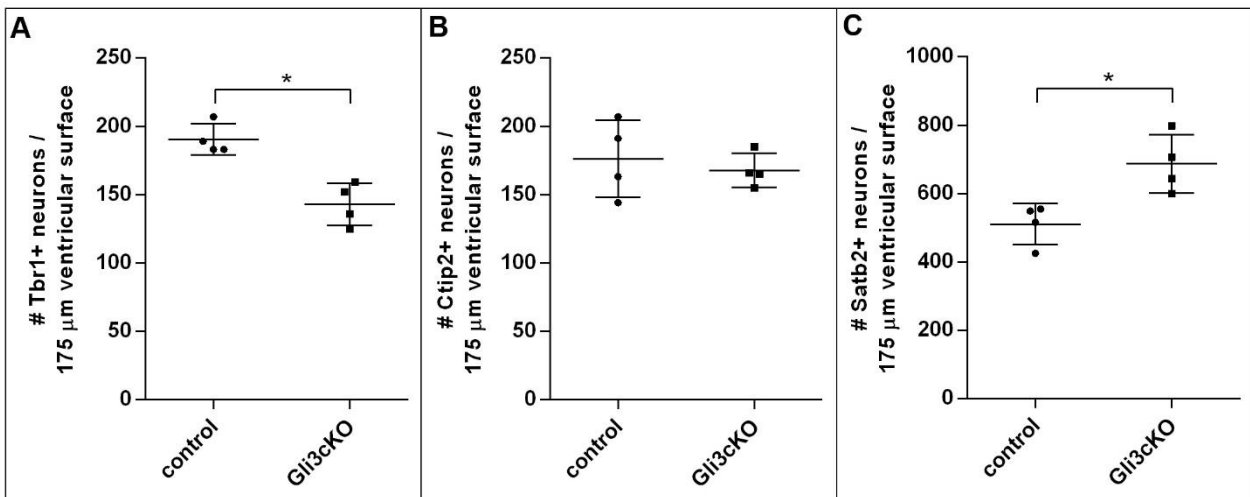

**Supplementary Figure 6: Gene ontology (GO) analysis** of genes differentially regulated in E11.5 (A) and E12.5 (B) cortical progenitor cells of *Emx1Cre;Gli3<sup>fl/fl</sup>* mutants. The X-axis values correspond to DAVID *p*-values. All terms reported have a false discovery rate (FDR) < 5%.

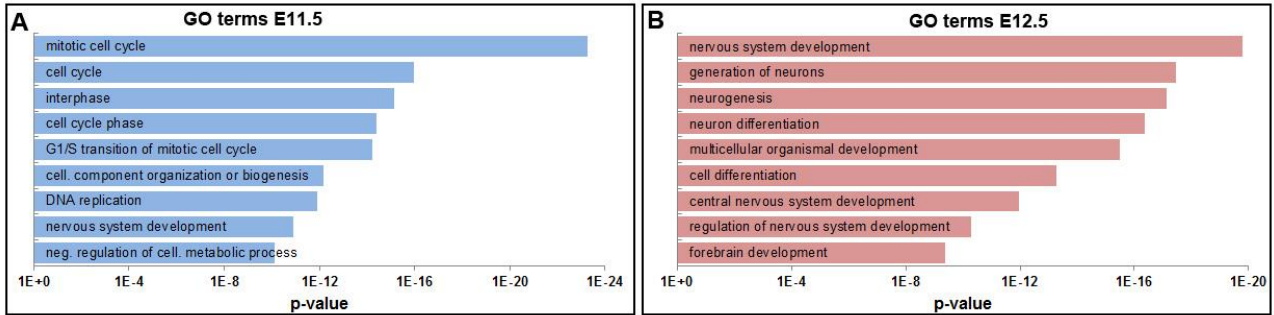

**Supplementary Figure 7: Proportion of proliferating vs differentiating in *Gli3*<sup>CKO</sup> mutants.** (A, B, E, F) Double immunostaining for Pax6 and GFP to distinguish proliferating (Pax6+GFP-) from differentiating (Pax6+GFP+) radial glial cells in *Gli3*<sup>CKO</sup> mutants positive for the *Tis21-GFP* transgene. (I) Quantification of the Pax6/GFP immunostainings. The proportion of proliferating radial glial cells is decreased in E12.5 *Gli3*<sup>CKO</sup> embryos (C, D, G, H) Coronal sections immunostained for Tbr2 and GFP showing proliferating (Tbr2+GFP-) and differentiating (Tbr2+GFP+) basal progenitors in *Gli3*<sup>CKO</sup> mutant, *Tis21-GFP*<sup>+</sup> embryos. (J) Quantification revealed an increased proportion of differentiating basal progenitors in E11.5 *Gli3*<sup>CKO</sup> mutant embryos. All statistical data is presented as means  $\pm$  95% CI; Mann Whitney tests; n = 4 except for (C, D) where n=5; \* p < 0.05. Scale bars: 50  $\mu$ m.

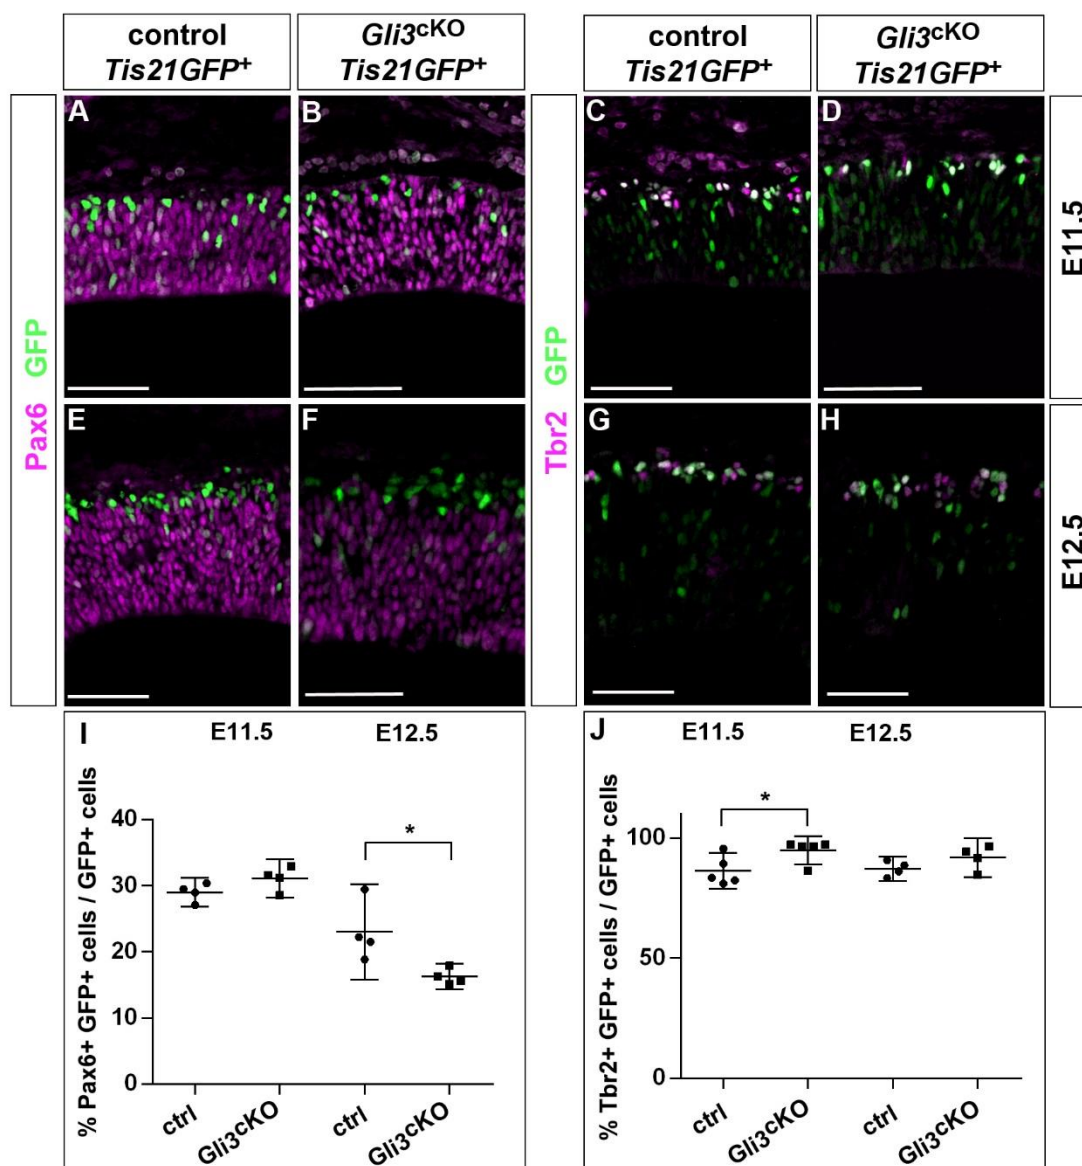

**Supplementary Figure 8: Neuron formation in the cortex of E12.5 *Gli3*<sup>ckO</sup> mutants after Palbociclib administration at E11.5.** (A-D) Immunohistochemistry for Tbr1 and BrdU revealing the proportions of newly formed neurons in E12.5 control and *Gli3*<sup>ckO</sup> embryos after BrdU and lactate or Palbociclib administration 24h earlier. Arrows indicate Tbr1+BrdU+ neurons (E) Quantifications of the immunostainings in (A-D). Statistical data is presented as means  $\pm$  95% CI; n = 5; \* p < 0.05; Kruskal-Wallis test with Dunn's multiple comparisons test. Scale bar: 50  $\mu$ m.

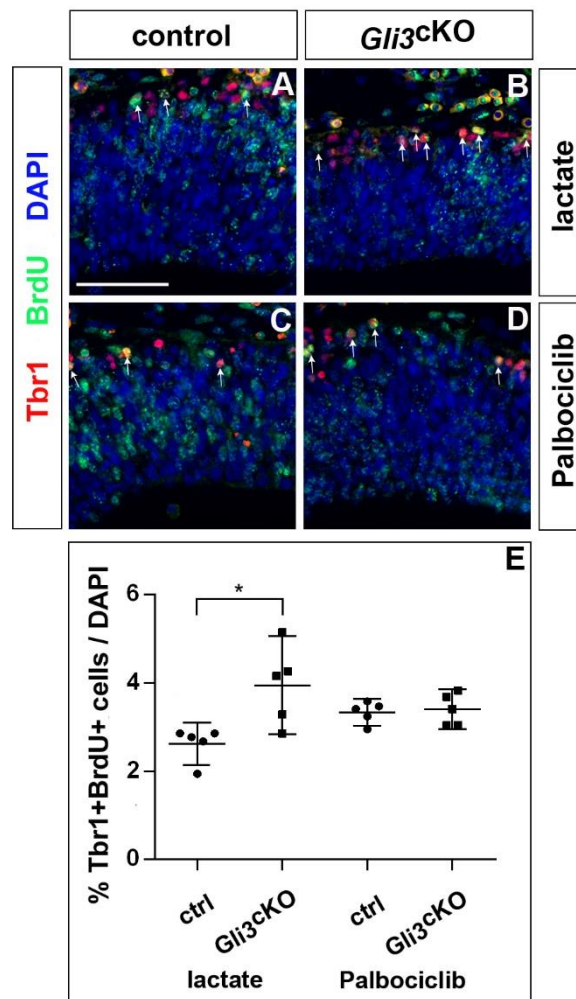



**Supplementary Table 1: Oligonucleotides used in this study**

| oligonucleotide                   | 5' - 3' sequence                | restriction site used for subcloning |
|-----------------------------------|---------------------------------|--------------------------------------|
| <b>EMSA</b>                       |                                 |                                      |
| Cdk_GliBS1_F                      | GACTCACGTGGGTGGGCTGAGGG         |                                      |
| Cdk_GliBS1_R                      | CCCCTCAGCCCACCCACGTGAGTC        |                                      |
| Cdk_GliBS1m_F                     | GACTCACGTGGGTATGCTGAGGG         |                                      |
| Cdk_GliBS1m_R                     | CCCCTCAGCATACCCACGTGAGTC        |                                      |
| Cdk_GliBS2_F                      | GGGGGGCTGTGTGGCCCCCTCGGAATC     |                                      |
| Cdk_GliBS2_R                      | GATTCCGAGGGGCCACACAGCCCCC       |                                      |
| Cdk_GliBS2_F                      | GGGGGGCTGTGTATCCCCTCGGAATC      |                                      |
| Cdk_GliBS2m_R                     | GATTCCGAGGGGATACACAGCCCCC       |                                      |
|                                   |                                 |                                      |
|                                   |                                 |                                      |
|                                   |                                 |                                      |
| <b>GST-Gli3_Zn finger cloning</b> |                                 |                                      |
| Gli3ZF_Fw                         | AAAGTCGACCAGGAGCCTGAAGTCATCTACG | Sall                                 |
| Gli3ZF_Rev                        | AAAGCGGCCGCGTCCCCACGCTGCTTCTTGG | NotI                                 |
|                                   |                                 |                                      |
|                                   |                                 |                                      |
| <b>Cdk6 promoter cloning</b>      |                                 |                                      |
| Cdk6_F1                           | AAAGGTACCCCGCCTCACCTGTCAACAC    | Asp718                               |
| Cdk6_R1                           | AAACTCGAGGCTGGCTTCAGGCTGCGGG    | XhoI                                 |
|                                   |                                 |                                      |
|                                   |                                 |                                      |
| <b>qRT-PCR</b>                    |                                 |                                      |
| CDK6_mRNA                         | ATGTTTCGCAGAAAGCCTCTT           |                                      |
| CDK6_mRNA                         | GTCCCTAGGCCAGTCTTCCT            |                                      |
| Actb_F                            | ACTATTGGCAACGAGCGGTT            |                                      |
| Actb_R                            | AGCACTGTGTTGGCATAGAGGT          |                                      |

**Supplementary Table 2: Antibodies used in this study**

| Antibody                      | Antigen                                                                                                    | Dilution  | Raised in | Source (Catalog #)        | Validation references |
|-------------------------------|------------------------------------------------------------------------------------------------------------|-----------|-----------|---------------------------|-----------------------|
| $\alpha$ -BrdU                | bromodeoxyuridine [BU1/75(CR1)]                                                                            | 01:50     | rabbit    | abcam (ab6326)            |                       |
| $\alpha$ -BrdU                | bromodeoxyuridine (clone B44)                                                                              | 01:50     | mouse     | Becton Dickinson (347580) |                       |
| $\alpha$ -Ctip2               | <i>H. sapiens</i> (aa1-150) [clone 25B6]                                                                   | 1:1000    | rat       | abcam (ab18465)           |                       |
| $\alpha$ -Flag                | synthetic peptide DYKDDDDK                                                                                 | 0.27mg/ml | mouse     | Sigma (F3165)             |                       |
| $\alpha$ -GFP                 | E. coli-derived recombinant full length protein corresponding to GFP                                       | 1:1000    | chicken   | abcam (ab13970)           |                       |
| $\alpha$ -Gli3                | E. coli-derived recombinant human GLI3 (aa1-479)                                                           | 1:200     | goat      | R&D Systems (AF3690)      | This work (Fig. S1)   |
| $\alpha$ -Pax6                | peptide:(QVPGSEPDMSQYWPRQLQ) derived from C-terminus of mouse Pax-6                                        | 1:400     | rabbit    | Biolegend (901301)        |                       |
| $\alpha$ -PCNA                | Protein A-rat PCNA fusion obtained from pC2T [PC10]                                                        | 1:500     | mouse     | abcam (ab29)              |                       |
| $\alpha$ -pHH3                | linear peptide corresponding to human Histone H3 at Ser10                                                  | 1:100     | rabbit    | Millipore (06-570)        |                       |
| $\alpha$ -Phospho-Rb (Ser780) | synthetic phosphopeptide corresponding to residues surrounding Ser780 of human Rb                          | 1:200     | rabbit    | Cell Signaling (9307)     |                       |
| $\alpha$ -Satb2               | recombinant fragment corresponding to Human SATB2 (C terminal)                                             | 1:200     | mouse     | Abcam (ab51502)           |                       |
| $\alpha$ -Tbr1                | synthetic peptide conjugated to KLH derived from within aa50-150 of mouse TBR1                             | 1:400     | rabbit    | abcam (ab31940)           |                       |
| $\alpha$ -Tbr2                | synthetic peptide conjugated to KLH derived from within residues 650 to the C-terminus of mouse TBR2/Eomes | 1:1000    | rabbit    | abcam (ab23345)           |                       |

**Supplementary Table 3: Differentially expressed genes in E11.5 and E12.5 *Gli3*<sup>CKO</sup> mutants.**

[Click here to Download Table S3](#)

**Supplementary Table 4: Summary of statistical analyses**

[Click here to Download Table S4](#)
